# Supplementary material for: Evolution of the locomotory system in eels (Teleostei: Elopomorpha)
Source: BMC Evol Biol. 2016 Aug 11;16:159. doi: 10.1186/s12862-016-0728-7 (PMC4981956; doi:10.1186/s12862-016-0728-7)
Supplement: Additional file 2: Table S1. — Measurements and statistic analyses of the vertebral column and musculotendinous system of extant and extinct anguilliforms. (XLS 109 kb) [file 12862_2016_728_MOESM2_ESM.xls]

## Sheet: Raw data
Taxa			Inv Nr	Laxis1 (mm)	Laxis2 (mm)	sec. axis reduction (Laxis1/Laxis2)	Hl (head length, mm)	Hd (head depth,mm)	NPCV (number precaudal vertebrae)	NCV (number precaudal vertebrae)	number vertebrae (in total)	ratio NPCV/NCV	head elongation (=Lhead*ARhead)	Lhead in length of vertebrae	Length vertebrae (precaudal)	Length vertebrae (caudal)	vertebrae depth (precaudal)	vertebrae depth (caudal)	average length vertebrae	ARPCV (ratio length to depth precaudal vertebrae)	ARCV (ratio length to depth caudal vertebrae)	Arhead (ratio headlength/head depth)	precaudal elongation (NPCV*ARPVC)	caudal elongation (NCV*ARCV)	average depth (precaudal vertebrae)	average depth (caudal vertebrae)	mean of average depth precaudal vertebrae/caudal vertebrae	length 1 (precaudal)	length 2 (precaudal)	length 3 (precaudal)	length 1 (caudal)	length 2 (caudal)	length 3 (caudal)	width 1 (precaudal)	width 2 (precaudal)	width 3 (precaudal)	width 1 (caudal)	width 2 (caudal)	width 3 (caudal)	VSI
Luenchelys minimus		Belouze et al. 2003	NHMUK P.62692a	136.6	10.017	13.6368	11.3	10.33	37	51	88	0.72549	8.86257	7.85632	1.58	1.29667	1.49	1.32	1.43833	1.0604	0.982323	1.12808	39.2349	50.0985	1.49	1.32	1.405	1.94	1.54	1.26	1.23	1.32	1.34	1.76	1.48	1.23	0.99	1.28	1.69	111.833
Anguilloides branchiostegalis		Agassiz 1935	NHM A.3319	342	18.06	18.9369	22	13.9	43	85	128	0.505882	12.0809	9.91736	2.40333	2.03333	2.59333	2.29	2.21833	0.926735	0.887918	1.21816	39.8496	75.4731	2.59333	2.29	2.44167	2.52	2.4	2.29	2.36	2.08	1.66	2.53	2.54	2.71	2.72	2.22	1.93	146.341
			MSNVR VII.A.18	353	17.81	19.8203	35.3	22.97	31	89	120	0.348315	27.3482	13.798	2.88333	2.23333	4.03	2.74667	2.55833	0.715467	0.813107	1.98203	22.1795	72.3665	4.03	2.74667	3.38833	2.91	3.06	2.68	2.55	2.15	2	4.09	3.7	4.3	2.25	3.39	2.6	141.714
			MSNVR T.887	292.1	6.49	45.0077	15	7.82	47	78	125	0.602564	33.8452	14.6437	1.00533	1.04333	1.53	1.09667	1.02433	0.657081	0.951368	2.31125	30.8828	74.2067	1.53	1.09667	1.31333	1.09	0.966	0.96	1.09	1.06	0.98	1.5	1.49	1.6	1.08	1.14	1.07	183.942
			NHMUK P.3876	261.8	11.43	22.9046	30.4	15.13	33	75	108	0.44	41.6415	15.6567	1.98667	1.89667	1.94333	2.45333	1.94167	1.0223	0.773098	2.65967	33.7358	57.9823	1.94333	2.45333	2.19833	1.89	1.94	2.13	1.83	1.99	1.87	1.58	1.38	2.87	2.14	2.49	2.73	156.264
Anguilla elegans			NHMUK 42769	555.4	34.5	16.0986	58.2	13.23	31	71	102	0.43662	19.669	11.6594	5.31667	4.66667	5.47	5.21333	4.99167	0.971968	0.895141	1.68696	30.131	63.555	5.47	5.21333	5.34167	4.41	5.68	5.86	5.42	4.4	4.18	5.81	4.88	5.72	5.53	5.02	5.09	129.454
Bolycyrus formosissimus		Agassiz 1935	NMW A.3324	284	14.06	20.1991	30	14.36	32	63	95	0.507937	28.4917	13.3531	2.29667	2.19667	3.16333	2.16	2.24667	0.726027	1.01698	2.13371	23.2329	64.0694	3.16333	2.16	2.66167	2.41	2.44	2.04	2.1	2.23	2.26	3.43	3.33	2.73	2.46	2.2	1.82	135.993
			MSNVR B.58	230	11.59	19.8447	26.5	12.08	14	50	64	0.28	17.1	7.47883	4.01333	3.07333	3.52	3.4	3.54333	1.14015	0.903922	2.28645	15.9621	45.1961	3.52	3.4	3.46	4.59	3.68	3.77	3.24	2.84	3.14	3.61	3.49	3.46	3.95	2.82	3.43	98.1029
			MSNVR T442	442.5	33.89	13.0569	94.3	26.74	34	61	95	0.557377	56.469	20.2941	4.79333	4.5	5.89333	4.29	4.64667	0.813348	1.04895	2.78253	27.6538	63.986	5.89333	4.29	5.09167	4.98	4.7	4.7	4.26	4.04	5.2	4.98	5.56	7.14	4.07	4.1	4.7	161.166
			MSNVR T.467	350	21.59	16.2112	57.2	17.15	28	57	85	0.491228	36.327	13.7115	3.67667	4.66667	2.98	3.59	4.17167	1.23378	1.29991	2.64937	34.5459	74.0947	2.98	3.59	3.285	3.69	4.01	3.33	3.99	5.72	4.29	3.25	2.87	2.82	3.53	4.41	2.83	161.179
			MSNVR T.468	314.4	21.34	14.7329	57.2	19.17	32	64	96	0.5	35.1785	13.1243	4.82667	3.89	4.19	4.35667	4.35833	1.15195	0.892884	2.68041	36.8624	57.1446	4.19	4.35667	4.27333	4.68	5.56	4.24	4.28	4.46	2.93	4.68	4.63	3.26	4.28	5.82	2.97	143.918
Voltaconger latispinus		Agassiz 1935	MSNVR VII.A.22	348.4	27.2	12.8088	57.2	25.44	29	46	75	0.630435										2.10294	0	0
			NHMUK P.1889	169.3	15.46	10.9508	28.4	10.36	24	54	78	0.444444	20.1561	10.9723	2.84333	2.33333	2.91667	2.35333	2.58833	0.974857	0.991501	1.837	23.3966	53.5411	2.91667	2.35333	2.635	3.2	2.55	2.78	1.97	2.38	2.65	2.85	2.73	3.17	2.31	2.16	2.59	108.045
			NHMUK P.17024	406.4	30.37	13.3816	70.8	27.92	34	45	79	0.755556	39.18	16.8065	4.18667	4.23867	4.77667	4.81667	4.21267	0.876483	0.88	2.33125	29.8004	39.6	4.77667	4.81667	4.79667	4.37	4	4.19	4.07	4.366	4.28	5.12	4.77	4.44	4.74	4.68	5.03	121.962
Paranguilla tigrina		Cadrobbi 1962	MSNVR T.990	423	19.4	21.8041	27.3	16.95	43	86	129	0.5	15.1149	10.741	2.53667	2.54667	2.39667	2.6	2.54167	1.05841	0.979487	1.40722	45.5118	84.2359	2.39667	2.6	2.49833	2.45	2.35	2.81	2.63	2.2	2.81	2.61	2.35	2.23	2.29	2.3	3.21	166.667
Anguilla anguilla	Anguillidae	Linneaus 1758	MCZ165917	81	11	7.36364			35	71	106	0.492958	9.9456	6.72						0.95	1.18	1.48	33.25	83.78																134.339
Anguilla bicolor	Anguillidae	McClelland 1844	CAS65009	37.7	6	6.28333			39	61	100	0.639344	22.5345	12.45						0.67	1.5	1.81	26.13	91.5																146.448
Anguilla japonica	Anguillidae	Temminck & Schlegel 1846	MCZ34306	63.3	7.1	8.91549			46	77	123	0.597403	18.82	9.41						1.11	1.83	2	51.06	140.91																219.705
Anguilla rostrata	Anguillidae	Lesueur 1817	RSM_1	220	27.5	8			50	70	120	0.714286	22.1445	8.55						1.13	1.19	2.59	56.5	83.3																169.945
Anguilla rostrata	Anguillidae		RSM_2	500	13	38.4615			44	66	110	0.666667	61.8192	14.58						1.96	2.62	4.24	86.24	172.92																359.441
Ariosoma anago	Congridae	Temminck & Schlegel 1846	MCZ72631	185	21.5	8.60465			70	91	161	0.769231	28.5114	15.58						1.04	1	1.83	72.8	91																200.916
Ariosoma balearicum	Congridae	Delaroche 1809	MCZ157253	145	21.5	6.74419			60	82	142	0.731707	26.6394	15.31						0.6	1.06	1.74	36	86.92																156.304
Bathyuroconger vicinus	Congridae	Vaillant 1888	CAS222813	135	19	7.10526			64	109	173	0.587156	38.6176	17.24						0.81	1.31	2.24	51.84	142.79																240.353
Conger myriaster	Congridae	Brevoort 1856	RSM_3	105.3	10.3	10.2233			55	92	147	0.597826	21.455	12.26						0.86	0.57	1.75	47.3	52.44																131.418
Dysomma anguilaire (anguillare)	Synaphobranchidae	Bernard 1923	CAS32403	180	20	9			64	68	132	0.941176	15.4976	9.28						1.11	1.44	1.67	71.04	97.92																193.458
Echidna nebulosa	Muraenidae	Ahl 1789	RSM_4	106	18.3	5.79235			55	70	125	0.785714	14.7315	8.05						1.25	0.95	1.83	68.75	66.5																155.774
Facciolella gilberti	Nettastomatidae	Garman 1899	CAS57843	135	10	13.5			48	146	194	0.328767	44.46	13.68						1.46	1.9	3.25	70.08	277.4																405.44
Gavialiceps taeniola	Muraenosocidae	Alcock 1889	MCZ133049	132	15	8.8			54	41	95	1.31707	28.49	11						2.5	2.22	2.59	135	91.02																263.31
Gymnothorax castanaeus	Muraenidae	Jordan & Gilbert 1883	RSM_5	112.5	17.5	6.42857			55	78	133	0.705128	20.86	10.43						0.68	9.94	2	37.4	775.32																840.009
Gymnothorax flavimarginatus	Muraenidae	Rüppell 1830	RSM_6	94.3	13	7.25385			51	81	132	0.62963	14.5415	11.45						0.65	0.65	1.27	33.15	52.65																107.595
Gymnothorax kidako	Muraenidae	Temminck & Schlegel 1846	RSM_7	73.3	8.7	8.42529			50	76	126	0.657895	12.0292	10.37						0.63	0.61	1.16	31.5	46.36																98.3145
Gymnothorax moringua	Muraenidae	Cuvier 1829	CAS13488	75.3	12.8	5.88281			55	81	136	0.679012	16.0718	9.86						1.2	1.4	1.63	66	113.4																201.355
Heteroconger hassi	Congridae	Klausewitz & Eibl-Eibesfeldt 1959	RSM_8	120.7	4	30.175			68	101	169	0.673267	12.84	6						0.6	1.89	2.14	40.8	190.89																274.705
Kaupichthys hyoporoides	Chlopsidae	Strömman 1896	CAS218219	75	7.5	10			53	65	118	0.815385	41.125	12.5						0.83	0.77	3.29	43.99	50.05																145.165
Moringua edwardsi	Moringuidae	Jordan & Bollman 1889	MCZ 44686	167.5	7.2	23.2639			83	37	120	2.24324	5.0112	3.48						3.8	3	1.44	315.4	111																454.675
Moringua javanica	Moringuidae	Kaup 1856	RSM_9	175	5	35			39	86	125	0.453488	4.96	3.2						3	3.33	1.55	117	286.38																443.34
Muraenosox cinereus	Muraenosocidae	Forsskal 1775	CAS51089	76	12.5	6.08			66	86	152	0.767442	24.6352	14.24						2	2.5	1.73	132	215																377.715
Myrichthys magnificus	Ophichthidae	Abbott 1860	RSM_10	123	8.5	14.4706			74	119	193	0.621849	15.4176	8.03						0.67	1.21	1.92	49.58	143.99																223.458
Myrophis vafer	Ophichthidae	Jordan & Gilbert 1883	RSM_11	164	1.6	102.5			89	56	145	1.58929	10.5219	4.33						1.83	1.63	2.43	162.87	91.28																367.172
Ophichthus maculosus	Ophichthidae	Cuvier 1816	MCZ55625	190	10	19			89	120	209	0.741667	7.0579	4.33						1.3	1.43	1.63	115.7	171.6																313.358
Ophichthus serpentius	Ophichthidae	Valid 1917	RSM_12	187.5	8	23.4375			79	112	191	0.705357	9.4734	5.54						1	1.25	1.71	79	140																251.911
Ophitchus zophochir	Ophichthidae	Jordan & Gilbert 1882	CAS11705	61.8	7	8.82857			49	100	149	0.49	15.58	9.5						1	0.83	1.64	49	83																156.409
Oxyconger leptognathus	Muraenosocidae	Bleeker 1858	CAS15857	172.5	15	11.5			52	63	115	0.825397	78.4738	20.33						1.1	1	3.86	57.2	63																210.174
Rhinomuraena quaesita	Muraenidae	Garman 1888	RSM_13	257.5	20.5	12.561			82	176	258	0.465909	21.5364	7.86						1.81	2.5	2.74	148.42	440																622.517
Saurenchelys fierasfer	Nettastomatidae	Jordan & Snyder 1901	CAS35145	191	11	17.3636			114	117	231	0.974359	72.2455	18.29						1.25	2.63	3.95	142.5	307.71																539.819
Scolecenchelys breviceps	Congridae	Günther 1876	MCZ73365	85	11	7.72727			40	95	135	0.421053	10.296	7.8						1.11	1.64	1.32	44.4	155.8																218.223
Scuticaria tigrinum (tigrina)	Muraenidae	Lesson 1828	RSM_14	400	26	15.3846			63	71	134	0.887324	26.5823	11.03						1.67	1.93	2.41	105.21	137.03																284.207
Serrivomer beanii	Serrivomeridae	Gill & Ryder 1883	MCZ124154	145	13	11.1538			56	111	167	0.504505	31.275	11.25						3.33	3.5	2.78	186.48	388.5																617.409
Simenchelys parasiticus	Synaphobranchidae	Gill 1879	MCZ124154	145	10	14.5			59	62	121	0.951613	11.3685	7.15						0.67	0.65	1.59	39.53	40.3																105.698
Uropterygius micropterus	Muraenidae	Bleeker 1852	CAS41189	72	10	7.2			56	80	136	0.7	9.078	8.9						1	0.91	1.02	56	72.8																145.078
Venefica proboscidea	Nettastomatidae	Vaillant 1888	MCZ165916	247.5	14	17.6786			68	54	122	1.25926	43.4558	13.33						2.36	2.06	3.26	160.48	111.24																332.854

## Sheet: Myosepta Bolycyrus
myosepta	total length (mm)	Position (%TL)	epaxial (mm)	%TL (epaxial)	hypaxial (mm)	%TL (hypaxial)
1-32 --> body cavity	295
33		40.678	3.8	1.28814	6	2.0339
34		42.0113	6.8	2.30508	7.2	2.44068
35		43.3446	10.3	3.49153	5.5	1.86441
36		44.678	10.2	3.45763	6.9	2.33898
37		46.0113	10.8	3.66102	6.2	2.10169
38		47.3446	7.9	2.67797	7.1	2.40678
39		48.678	8.8	2.98305	6.8	2.30508
40		50.0113	6.2	2.10169	5.9	2
41		51.3446	5.6	1.89831	5.5	1.86441
42		52.678	4.8	1.62712	6.7	2.27119
43		54.0113	5.5	1.86441	5.7	1.9322
44		55.3446	4.8	1.62712	6.5	2.20339
45		56.678	4.8	1.62712	7.6	2.57627
46		58.0113		0		0
47		59.3446	4.8	1.62712		0
48		60.678	4.1	1.38983		0
49		62.0113	4.8	1.62712		0
50		63.3446	6.2	2.10169		0
51		64.678		0		0
52		66.0113	5.4	1.83051	10.6	3.59322
53		67.3446	5	1.69492	5	1.69492
54	last myorhabdoid tendon (epaxial)	68.678	4.8	1.62712	5.6	1.89831
55		70.0113	6.3	2.13559	4.7	1.59322
56		71.3446	6	2.0339	4.2	1.42373
57		72.678	6	2.0339	4.7	1.59322
58		74.0113	5.3	1.79661	4.8	1.62712
59		75.3446	4.8	1.62712	3.8	1.28814
60		76.678	8.8	2.98305	4.6	1.55932
61		78.0113	7.5	2.54237	5	1.69492
62		79.3446	9	3.05085	4.4	1.49153
63		80.678	7.5	2.54237	5.3	1.79661
64		82.0113	7.8	2.64407	5.8	1.9661
65		83.3446	4.8	1.62712	6.1	2.0678
66		84.678	10.2	3.45763	6.4	2.16949
67		86.0113	8.4	2.84746	5.4	1.83051
68		87.3446	6	2.0339		0
69	260	88.1356	8.8	2.98305		0
70		89.4689	3.8	1.28814	4.8	1.62712
71		90.8023	3.8	1.28814	6	2.0339
72
.... 81

## Sheet: Myosepta Anguilloides branchios
myosepta	total length (mm)	Position (%TL)	epaxial (mm)	%TL (epaxial)	hypaxial (mm)	%TL (hypaxial)
1-39 --> Leibeshöhle	340
40		19.7	5.5	1.61765		0		Supplement 7
41		21.0236	6.8	2		0		Anguilloides branchiostegalis
42		22.3472	6.7	1.97059		0		NMW A3319
43		23.6708	6.7	1.97059		0
44		24.9944		0	4	1.17647
45		26.318	7.8	2.29412	6.8	2
46		27.6416	7.7	2.26471	6.5	1.91176
47		28.9652	6.2	1.82353	7.2	2.11765
48		30.2888	5.2	1.52941	7.2	2.11765
49		31.6124	5.7	1.67647	8	2.35294
50		32.936	6.1	1.79412	6.7	1.97059
51		34.2596	6.7	1.97059	5.3	1.55882
52		35.5832	6.6	1.94118	5.8	1.70588
53		36.9068	5.6	1.64706	6.4	1.88235
54		38.2304	7.5	2.20588	7.1	2.08824
55		39.554	8.8	2.58824	6.1	1.79412
56		40.8776	8.9	2.61765	6.5	1.91176
57		42.2012	4.9	1.44118	4.4	1.29412
58		43.5248	8.2	2.41176	5.3	1.55882
59		44.8484	4.7	1.38235	4.9	1.44118
60		46.172	6.2	1.82353	6.3	1.85294
61		47.4956	6.8	2	4.7	1.38235
62		48.8192	7.8	2.29412	6.6	1.94118
63		50.1428	8.3	2.44118	7.3	2.14706
64		51.4664	10.5	3.08824	7	2.05882
65		52.79	8	2.35294		0
66		54.1136	6.9	2.02941		0
67		55.4372		0		0
68		56.7608		0		0
69		58.0844		0		0
70		59.408		0		0
71		60.7316		0		0
72		62.0552	7	2.05882	6.7	1.97059
73		63.3788	6.7	1.97059		0
74		64.7024	5.8	1.70588	6.5	1.91176
75		66.026	6.2	1.82353	8.8	2.58824
76		67.3496	7	2.05882	9.8	2.88235
77		68.6732	7.8	2.29412	11.8	3.47059
78		69.9968	9.5	2.79412	7.9	2.32353
79		71.3204	7.6	2.23529	12.4	3.64706
80		72.644	8	2.35294	10.5	3.08824
81		73.9676	10	2.94118	7	2.05882
82		75.2912	7.9	2.32353	10.7	3.14706
83		76.6148	7.2	2.11765	11.2	3.29412
84		77.9384	5.4	1.58824	6.6	1.94118
85		79.262	6.8	2	7.2	2.11765
86		80.5856	9.1	2.67647	8	2.35294
87		81.9092	5.9	1.73529	8.8	2.58824
88		83.2328	5.8	1.70588	5.8	1.70588
89		84.5564	7.8	2.29412	8.2	2.41176
90		85.88	7.5	2.20588	8.7	2.55882

## Sheet: PCA
Parameter	PC1	PC2	PC3
Laxis1	0.716	-0.384	0.049
Laxis2	0.702	-0.33	-0.137
NPCV	-0.141	0.741	0.334
NCV	-0.012	0.813	-0.094
Lhead in length of vertebrae	0.81	0.09	-0.267
ARPCV	-0.075	-0.066	0.875
ARCV	-0.005	0.161	0.683
Arhead	0.714	0.296	0.326

## Sheet: PICs, Pagel, Bloomberg
Pagel's lambda
	lambda	logL	log0	p-value
Laxis1	0.63083	-251.034	-252.756	0.06346		λ =1: phylogeny explains changes in traits (traits follows the brownian motion model of evolution)
NPCV	0.68503	-172.349	-177.809	0.00095154		λ =0:phylogeny collapsed to a star phylogeny to explain trait evolution under the brownian modtion model
NCV	0.356694	-192.826	-195.274	0.0269256
Bloomberg's K-value
	K-value	p-value				K<1: closely related species resemble each other less than expected under the Brownian motion model of trait evolution
Laxis1	0.3182	0.253				K>1: closely related species are more similar than predicted by the Brownian motion model of trait evolution
NPCV	0.4144	0.164				great values of K suggest a stong effect of phylogenetic signal
NCV	0.3251	0.284
Statistical parameters:
Branch length = 1
nsim = 1000

## Sheet: Abbreviations
Laxis 1	total length
Laxis 2	total width
NCV	number caudal vertebrae
NPCV	number precaudal vertebrae
MCZ	Museum of Comparative Zoology, Harvard University, Cambridge, U.S.A.
MSNVR	Museo Civico di Storia Naturale, Verona, Italy
NHMUK	Natural History Museum London, UK
NMW	Naturhistorisches Museum Wien, Austria
npr	not preserved
TL	total length
HL	head length
LT	lateral tendon
prAL	preanal length
poAL	postanal length
